# Supplementary material for: Perioperative changes in haemoglobin and ferritin concentrations from preoperative intravenous iron isomaltoside for iron deficiency anaemia in patients with colorectal cancer: A pilot randomised controlled trial
Source: PLOS journal article supplement (doi:10.1371/journal.pone.0270640), 2022-06-30
Supplement: S1 (10.1371/journal.pone.0270640.s001) [file journal.pone.0270640.s001]

CONSORT checklist of information to include when reporting a pilot trial\*

| Section/topic and item No  | Standard checklist item                                                                                                               | Extension for pilot trials                                                                                                                                   | Page No where item is reported |
|----------------------------|---------------------------------------------------------------------------------------------------------------------------------------|--------------------------------------------------------------------------------------------------------------------------------------------------------------|--------------------------------|
| <b>Title and abstract</b>  |                                                                                                                                       |                                                                                                                                                              |                                |
| 1a                         | Identification as a randomised trial in the title                                                                                     | Identification as a pilot or feasibility randomised trial in the title                                                                                       | 1                              |
| 1b                         | Structured summary of trial design, methods, results, and conclusions (for specific guidance see CONSORT for abstracts)               | Structured summary of pilot trial design, methods, results, and conclusions (for specific guidance see CONSORT abstract extension for pilot trials)          | 2-3                            |
| <b>Introduction</b>        |                                                                                                                                       |                                                                                                                                                              |                                |
| Background and objectives: |                                                                                                                                       |                                                                                                                                                              |                                |
| 2a                         | Scientific background and explanation of rationale                                                                                    | Scientific background and explanation of rationale for future definitive trial, and reasons for randomised pilot trial                                       | 4                              |
| 2b                         | Specific objectives or hypotheses                                                                                                     | Specific objectives or research questions for pilot trial                                                                                                    | 5                              |
| <b>Methods</b>             |                                                                                                                                       |                                                                                                                                                              |                                |
| Trial design:              |                                                                                                                                       |                                                                                                                                                              |                                |
| 3a                         | Description of trial design (such as parallel, factorial) including allocation ratio                                                  | Description of pilot trial design (such as parallel, factorial) including allocation ratio                                                                   | 5                              |
| 3b                         | Important changes to methods after trial commencement (such as eligibility criteria), with reasons                                    | Important changes to methods after pilot trial commencement (such as eligibility criteria), with reasons                                                     | 15                             |
| Participants:              |                                                                                                                                       |                                                                                                                                                              |                                |
| 4a                         | Eligibility criteria for participants                                                                                                 |                                                                                                                                                              | 5-6                            |
| 4b                         | Settings and locations where the data were collected                                                                                  |                                                                                                                                                              | 5-7                            |
| 4c                         |                                                                                                                                       | How participants were identified and consented                                                                                                               | 5                              |
| Interventions:             |                                                                                                                                       |                                                                                                                                                              |                                |
| 5                          | The interventions for each group with sufficient details to allow replication, including how and when they were actually administered |                                                                                                                                                              | 6                              |
| Outcomes:                  |                                                                                                                                       |                                                                                                                                                              |                                |
| 6a                         | Completely defined prespecified primary and secondary outcome measures, including how and when they were assessed                     | Completely defined prespecified assessments or measurements to address each pilot trial objective specified in 2b, including how and when they were assessed | 7                              |
| 6b                         | Any changes to trial outcomes after the trial commenced, with reasons                                                                 | Any changes to pilot trial assessments or measurements after the pilot trial commenced, with reasons                                                         | na                             |
| 6c                         |                                                                                                                                       | If applicable, prespecified criteria used to judge whether, or how, to proceed with future definitive trial                                                  | 17-18                          |

|                                                       |                                                                                                                                                                                             |                                                                                                                                                                                       |          |
|-------------------------------------------------------|---------------------------------------------------------------------------------------------------------------------------------------------------------------------------------------------|---------------------------------------------------------------------------------------------------------------------------------------------------------------------------------------|----------|
| Sample size:                                          |                                                                                                                                                                                             |                                                                                                                                                                                       |          |
| 7a                                                    | How sample size was determined                                                                                                                                                              | Rationale for numbers in the pilot trial                                                                                                                                              | 8        |
| 7b                                                    | When applicable, explanation of any interim analyses and stopping guidelines                                                                                                                |                                                                                                                                                                                       | na       |
| Randomisation:                                        |                                                                                                                                                                                             |                                                                                                                                                                                       |          |
| Sequence generation:                                  |                                                                                                                                                                                             |                                                                                                                                                                                       |          |
| 8a                                                    | Method used to generate the random allocation sequence                                                                                                                                      |                                                                                                                                                                                       | 6        |
| 8b                                                    | Type of randomisation; details of any restriction (such as blocking and block size)                                                                                                         | Type of randomisation(s); details of any restriction (such as blocking and block size)                                                                                                | 6        |
| Allocation concealment mechanism:                     |                                                                                                                                                                                             |                                                                                                                                                                                       |          |
| 9                                                     | Mechanism used to implement the random allocation sequence (such as sequentially numbered containers), describing any steps taken to conceal the sequence until interventions were assigned |                                                                                                                                                                                       | 6        |
| Implementation:                                       |                                                                                                                                                                                             |                                                                                                                                                                                       |          |
| 10                                                    | Who generated the random allocation sequence, enrolled participants, and assigned participants to interventions                                                                             |                                                                                                                                                                                       | 6        |
| Blinding:                                             |                                                                                                                                                                                             |                                                                                                                                                                                       |          |
| 11a                                                   | If done, who was blinded after assignment to interventions (eg, participants, care providers, those assessing outcomes) and how                                                             |                                                                                                                                                                                       | 6-7      |
| 11b                                                   | If relevant, description of the similarity of interventions                                                                                                                                 |                                                                                                                                                                                       | na       |
| Analytical methods:                                   |                                                                                                                                                                                             |                                                                                                                                                                                       |          |
| 12a                                                   | Statistical methods used to compare groups for primary and secondary outcomes                                                                                                               | Methods used to address each pilot trial objective whether qualitative or quantitative                                                                                                | 8-9      |
| 12b                                                   | Methods for additional analyses, such as subgroup analyses and adjusted analyses                                                                                                            | Not applicable                                                                                                                                                                        | na       |
| <b>Results</b>                                        |                                                                                                                                                                                             |                                                                                                                                                                                       |          |
| Participant flow (a diagram is strongly recommended): |                                                                                                                                                                                             |                                                                                                                                                                                       |          |
| 13a                                                   | For each group, the numbers of participants who were randomly assigned, received intended treatment, and were analysed for the primary outcome                                              | For each group, the numbers of participants who were approached and/or assessed for eligibility, randomly assigned, received intended treatment, and were assessed for each objective | 9, Fig 1 |
| 13b                                                   | For each group, losses and exclusions after randomisation, together with reasons                                                                                                            |                                                                                                                                                                                       | 9, Fig 1 |
| Recruitment:                                          |                                                                                                                                                                                             |                                                                                                                                                                                       |          |

|                          |                                                                                                                                                   |                                                                                                                                                                                |                              |
|--------------------------|---------------------------------------------------------------------------------------------------------------------------------------------------|--------------------------------------------------------------------------------------------------------------------------------------------------------------------------------|------------------------------|
| 14a                      | Dates defining the periods of recruitment and follow-up                                                                                           |                                                                                                                                                                                | 9                            |
| 14b                      | Why the trial ended or was stopped                                                                                                                | Why the pilot trial ended or was stopped                                                                                                                                       | na                           |
| Baseline data:           |                                                                                                                                                   |                                                                                                                                                                                |                              |
| 15                       | A table showing baseline demographic and clinical characteristics for each group                                                                  |                                                                                                                                                                                | Table 1                      |
| Numbers analysed:        |                                                                                                                                                   |                                                                                                                                                                                |                              |
| 16                       | For each group, number of participants (denominator) included in each analysis and whether the analysis was by original assigned groups           | For each objective, number of participants (denominator) included in each analysis. If relevant, these numbers should be by randomised group                                   | Table 2<br>9-13              |
| Outcomes and estimation: |                                                                                                                                                   |                                                                                                                                                                                |                              |
| 17a                      | For each primary and secondary outcome, results for each group, and the estimated effect size and its precision (such as 95% confidence interval) | For each objective, results including expressions of uncertainty (such as 95% confidence interval) for any estimates. If relevant, these results should be by randomised group | Table 2<br>12-13,<br>Fig 2,3 |
| 17b                      | For binary outcomes, presentation of both absolute and relative effect sizes is recommended                                                       | Not applicable                                                                                                                                                                 | na                           |
| Ancillary analyses:      |                                                                                                                                                   |                                                                                                                                                                                |                              |
| 18                       | Results of any other analyses performed, including subgroup analyses and adjusted analyses, distinguishing prespecified from exploratory          | Results of any other analyses performed that could be used to inform the future definitive trial                                                                               | 16                           |
| Harms:                   |                                                                                                                                                   |                                                                                                                                                                                |                              |
| 19                       | All important harms or unintended effects in each group (for specific guidance see CONSORT for harms)                                             |                                                                                                                                                                                | 13                           |
| 19a                      |                                                                                                                                                   | If relevant, other important unintended consequences                                                                                                                           | na                           |
| <b>Discussion</b>        |                                                                                                                                                   |                                                                                                                                                                                |                              |
| Limitations:             |                                                                                                                                                   |                                                                                                                                                                                |                              |
| 20                       | Trial limitations, addressing sources of potential bias, imprecision, and, if relevant, multiplicity of analyses                                  | Pilot trial limitations, addressing sources of potential bias and remaining uncertainty about feasibility                                                                      | 15, 17                       |
| Generalisability:        |                                                                                                                                                   |                                                                                                                                                                                |                              |
| 21                       | Generalisability (external validity, applicability) of the trial findings                                                                         | Generalisability (applicability) of pilot trial methods and findings to future definitive trial and other studies                                                              | 17-18                        |
| Interpretation:          |                                                                                                                                                   |                                                                                                                                                                                |                              |
| 22                       | Interpretation consistent with results, balancing benefits and harms, and considering other relevant evidence                                     | Interpretation consistent with pilot trial objectives and findings, balancing potential benefits and harms, and considering other relevant evidence                            | 15-18                        |
| 22a                      |                                                                                                                                                   | Implications for progression from pilot to future definitive trial, including any proposed amendments                                                                          |                              |
| <b>Other information</b> |                                                                                                                                                   |                                                                                                                                                                                |                              |

Registration:

23

Registration number and name of trial registry

Registration number for pilot trial and name of trial registry

3, 5

Protocol:

24

Where the full trial protocol can be accessed, if available

Where the pilot trial protocol can be accessed, if available

separate  
file

Funding:

25

Sources of funding and other support (such as supply of drugs), role of funders

none

26

Ethical approval or approval by research review committee, confirmed with reference number

5

---

\*Here a pilot trial means any randomised study conducted in preparation for a future definitive RCT, where the main objective of the pilot trial is to assess feasibility.
